# Supplementary material for: Particle-Assisted Dermal Penetration—A Simple Formulation Strategy to Foster the Dermal Penetration Efficacy
Source: MDPI journal article supplement (doi:10.3390/pharmaceutics14051039), 2022-05-11
Supplement: s1 [file s1]

# Particle assisted dermal penetration – a mechanistic proof of concept study

Sabrina Wiemann and Cornelia M. Keck \*

## Supplementary material – Section S1

All images were subjected to an automated RGB-threshold algorithm. The macros were established with ImageJ software for each part of the study to adjust for the variations in the skin's autofluorescence. The macros used are provided in table S1.

**Table S1:** Macros used for the RGB-threshold algorithms.

| Particle assisted dermal penetration with titanium dioxide particles                                                                                                                                                                                                                                                                                                                                                                                                                                                                                                                 | Particle assisted dermal penetration with NLC                                                                                                                                                                                                                                                                                                                                                                                                                                                                                                                                       | Particle assisted penetration and addition of humectants                                                                                                                                                                                                                                                                                                                                                                                                                                                                                                                             |
|--------------------------------------------------------------------------------------------------------------------------------------------------------------------------------------------------------------------------------------------------------------------------------------------------------------------------------------------------------------------------------------------------------------------------------------------------------------------------------------------------------------------------------------------------------------------------------------|-------------------------------------------------------------------------------------------------------------------------------------------------------------------------------------------------------------------------------------------------------------------------------------------------------------------------------------------------------------------------------------------------------------------------------------------------------------------------------------------------------------------------------------------------------------------------------------|--------------------------------------------------------------------------------------------------------------------------------------------------------------------------------------------------------------------------------------------------------------------------------------------------------------------------------------------------------------------------------------------------------------------------------------------------------------------------------------------------------------------------------------------------------------------------------------|
| <pre>// Color Thresholder 1.52a // Autogenerated macro, single images only! min=newArray(3); max=newArray(3); filter=newArray(3); a=getTitle(); run("RGB Stack"); run("Convert Stack to Images"); selectWindow("Red"); rename("0"); selectWindow("Green"); rename("1"); selectWindow("Blue"); rename("2"); min[0]=0; max[0]=0; filter[0]="stop"; min[1]=100; max[1]=255; filter[1]="pass"; min[2]=0; max[2]=0; filter[2]="stop"; for (i=0;i&lt;3;i++){   selectWindow(""+i);   setThreshold(min[i], max[i]);   run("Convert to Mask");   if (filter[i]=="stop") run("Invert");</pre> | <pre>// Color Thresholder 1.52a // Autogenerated macro, single images only! min=newArray(3); max=newArray(3); filter=newArray(3); a=getTitle(); run("RGB Stack"); run("Convert Stack to Images"); selectWindow("Red"); rename("0"); selectWindow("Green"); rename("1"); selectWindow("Blue"); rename("2"); min[0]=0; max[0]=0; filter[0]="stop"; min[1]=60; max[1]=255; filter[1]="pass"; min[2]=0; max[2]=0; filter[2]="stop"; for (i=0;i&lt;3;i++){   selectWindow(""+i);   setThreshold(min[i], max[i]);   run("Convert to Mask");   if (filter[i]=="stop") run("Invert");</pre> | <pre>// Color Thresholder 1.52a // Autogenerated macro, single images only! min=newArray(3); max=newArray(3); filter=newArray(3); a=getTitle(); run("RGB Stack"); run("Convert Stack to Images"); selectWindow("Red"); rename("0"); selectWindow("Green"); rename("1"); selectWindow("Blue"); rename("2"); min[0]=0; max[0]=0; filter[0]="stop"; min[1]=119; max[1]=255; filter[1]="pass"; min[2]=0; max[2]=0; filter[2]="stop"; for (i=0;i&lt;3;i++){   selectWindow(""+i);   setThreshold(min[i], max[i]);   run("Convert to Mask");   if (filter[i]=="stop") run("Invert");</pre> |

|                                                                                                                                                                                                                                                                                                            |                                                                                                                                                                                                                                                                                                            |                                                                                                                                                                                                                                                                                                            |
|------------------------------------------------------------------------------------------------------------------------------------------------------------------------------------------------------------------------------------------------------------------------------------------------------------|------------------------------------------------------------------------------------------------------------------------------------------------------------------------------------------------------------------------------------------------------------------------------------------------------------|------------------------------------------------------------------------------------------------------------------------------------------------------------------------------------------------------------------------------------------------------------------------------------------------------------|
| <pre> } imageCalculator("AND create", "0", "1"); imageCalculator("AND create", "Result of 0", "2"); for (i=0;i&lt;3;i++){     selectWindow(""+i);     close(); } selectWindow("Result of 0"); close(); selectWindow("Result of Result of 0"); rename(a); // Colour Thresholding----- run("Invert"); </pre> | <pre> } imageCalculator("AND create", "0", "1"); imageCalculator("AND create", "Result of 0", "2"); for (i=0;i&lt;3;i++){     selectWindow(""+i);     close(); } selectWindow("Result of 0"); close(); selectWindow("Result of Result of 0"); rename(a); // Colour Thresholding----- run("Invert"); </pre> | <pre> } imageCalculator("AND create", "0", "1"); imageCalculator("AND create", "Result of 0", "2"); for (i=0;i&lt;3;i++){     selectWindow(""+i);     close(); } selectWindow("Result of 0"); close(); selectWindow("Result of Result of 0"); rename(a); // Colour Thresholding----- run("Invert"); </pre> |
|------------------------------------------------------------------------------------------------------------------------------------------------------------------------------------------------------------------------------------------------------------------------------------------------------------|------------------------------------------------------------------------------------------------------------------------------------------------------------------------------------------------------------------------------------------------------------------------------------------------------------|------------------------------------------------------------------------------------------------------------------------------------------------------------------------------------------------------------------------------------------------------------------------------------------------------------|
